# Supplementary material for: A sugar–pyrene-based fluorescent gelator: nanotubular architecture and interaction with SWCNTs
Source: Royal Society of Chemistry journal article supplement (doi:10.1039/b9nj00395a), 2009-01-01

## **Supporting Information**

### **Sugar-pyrene Based Fluorescent Gelator: Nanotubular Architecture and Interaction with SWCNT**

*Subbiah Nagarajan, Thangamuthu Mohan Das\**  
*Department of Organic Chemistry,*  
*University of Madras, Guindy Campus,*  
*Chennai-600 025, INDIA.*  
*Fax: (+) 91-44-22352494; Tel: +91 44 22202814;*  
*E-mail: tmdas\_72@yahoo.com*

|                                                                                       |    |
|---------------------------------------------------------------------------------------|----|
| Figure 1. <sup>1</sup> H NMR spectrum of compound <b>3a</b> .                         | 2  |
| Figure 2. <sup>13</sup> C NMR spectrum of compound <b>3a</b> .                        | 3  |
| Figure 3. <sup>1</sup> H NMR spectrum of compound <b>3b</b> .                         | 4  |
| Figure 4. <sup>13</sup> C NMR spectrum of compound <b>3b</b> .                        | 5  |
| Figure 5. <sup>1</sup> H NMR spectrum of compound <b>3c</b> .                         | 6  |
| Figure 6. <sup>13</sup> C NMR spectrum of compound <b>3c</b> .                        | 7  |
| Figure 7. <sup>1</sup> H NMR spectrum of compound <b>3d</b> .                         | 8  |
| Figure 8. <sup>13</sup> C NMR spectrum of compound <b>3d</b> .                        | 9  |
| Figure 9. Microanalysis report (EDAX) of gel <b>3a</b> .                              | 10 |
| Figure 10 Microanalysis report (EDAX) of Sugar-pyrene functionalized SWCNT            | 11 |
| Figure 11. HRSEM image of gel, <b>3a</b> (nanotubular architecture pointed by arrows) | 12 |

Figure 1.  $^1\text{H}$  NMR spectra of compound **3a**.

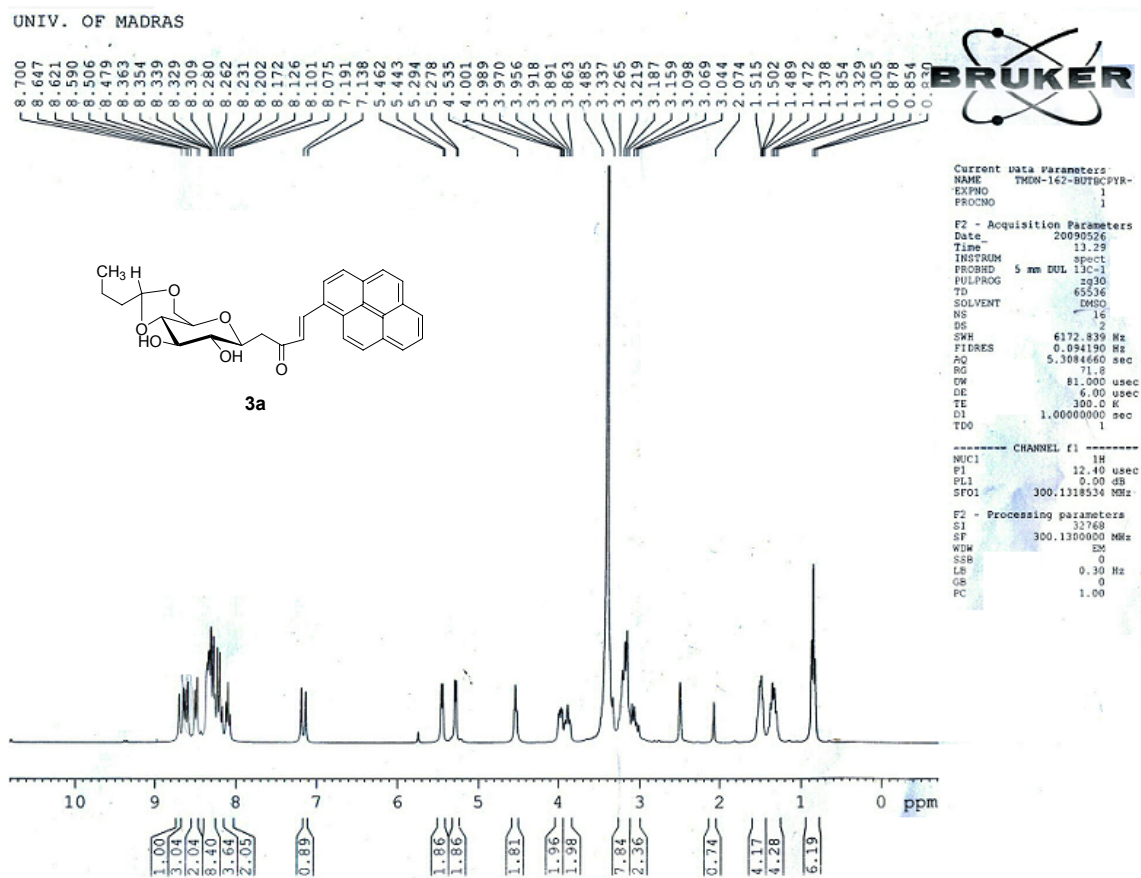

Figure 2.  $^{13}\text{C}$  NMR spectra of compound **3a**.

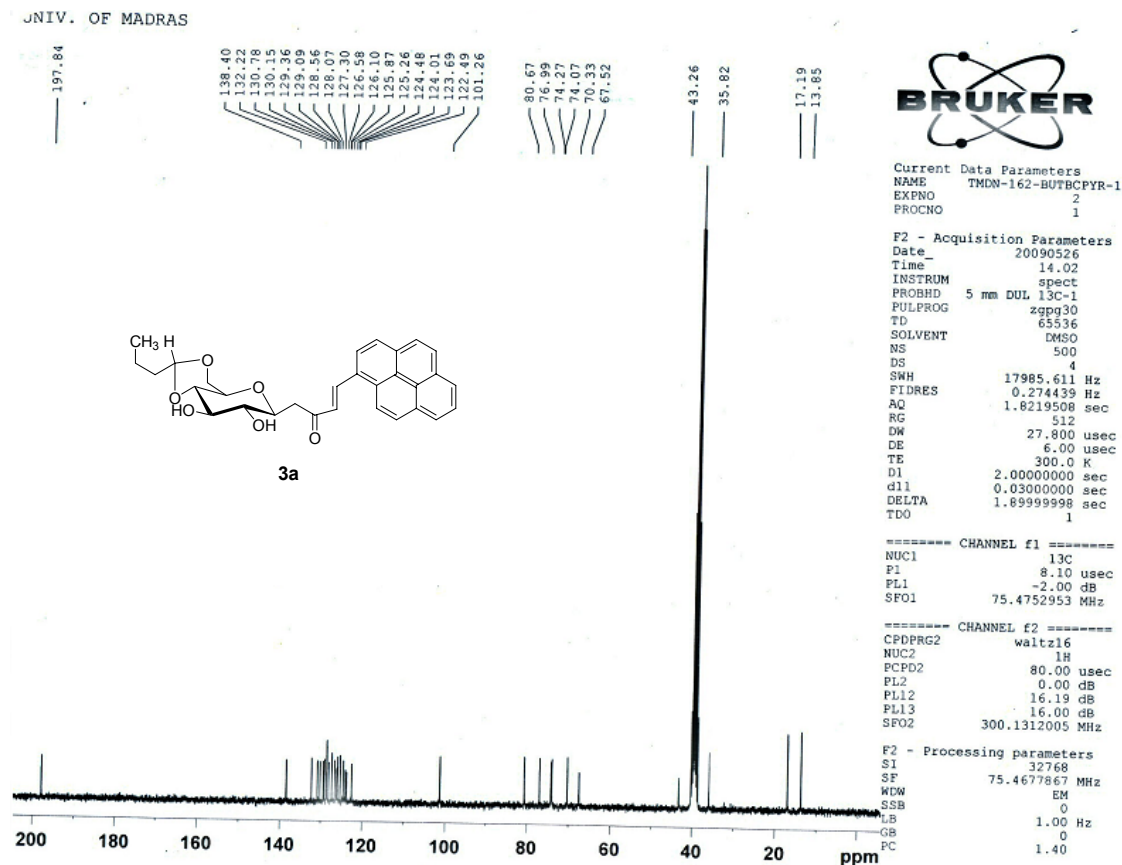

Figure 3.  $^1\text{H}$  NMR spectra of compound **3b**.

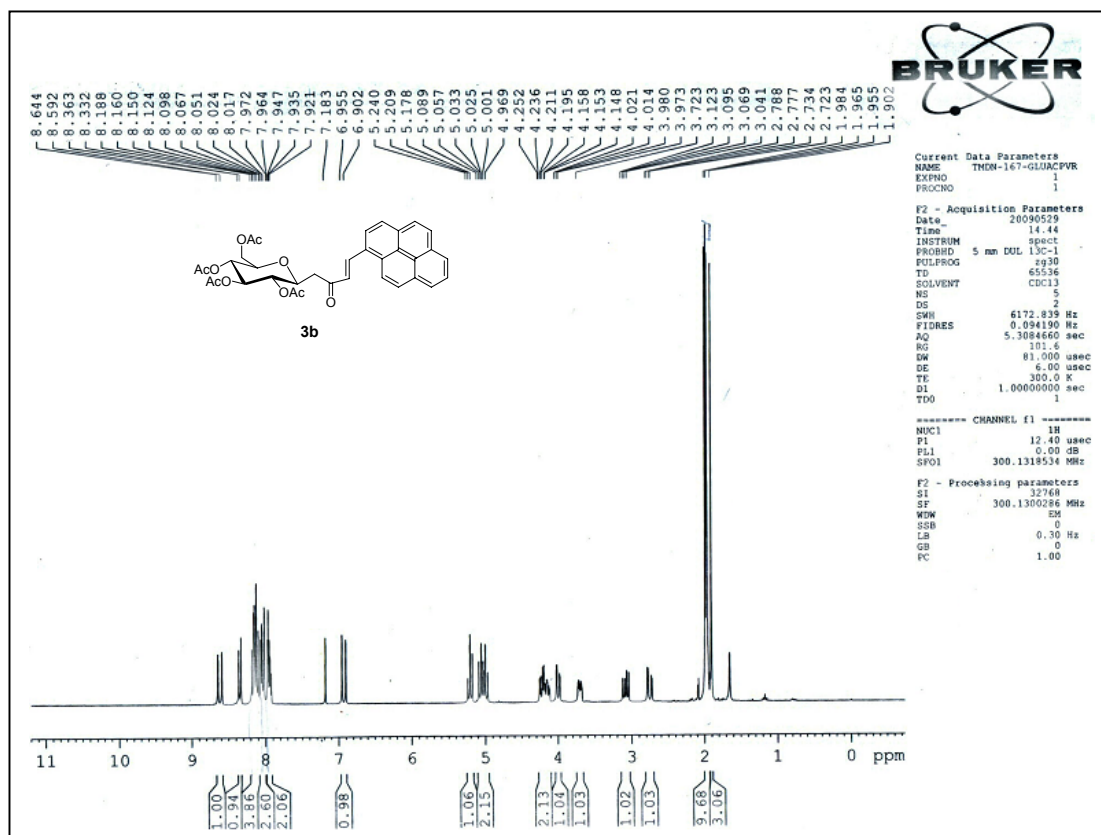

Figure 4.  $^{13}\text{C}$  NMR spectra of compound **3b**.

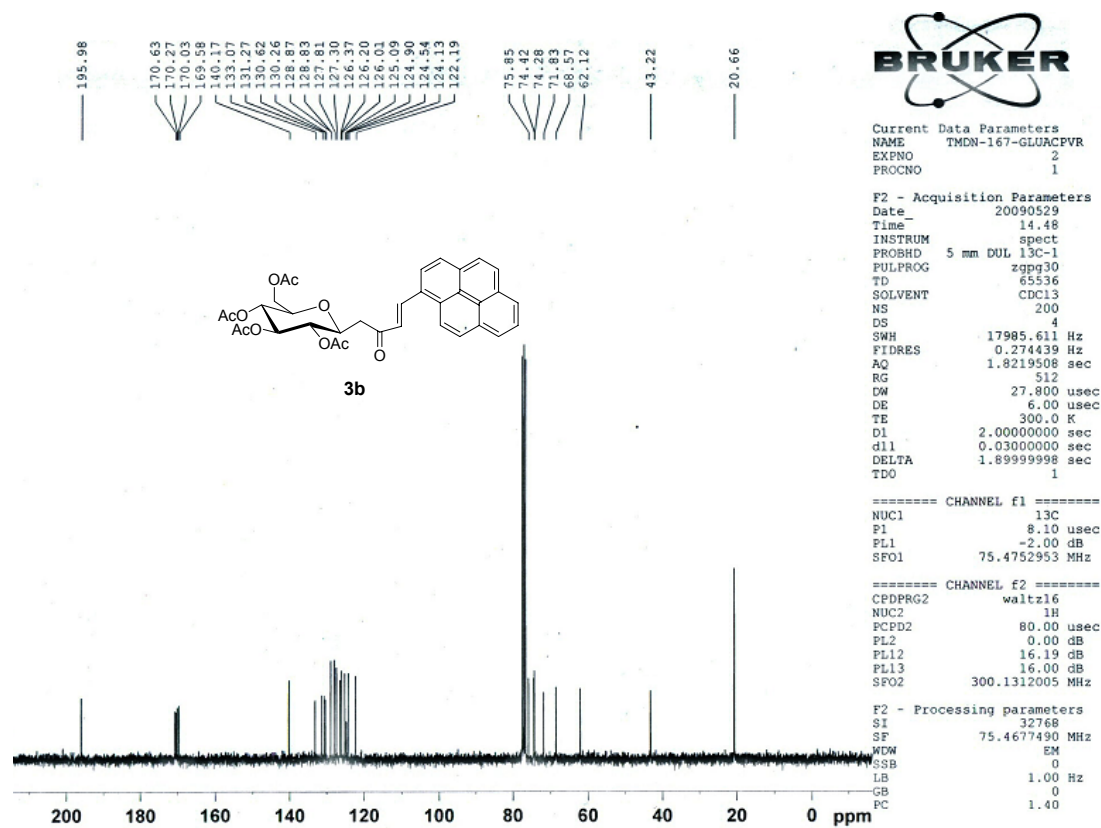

Figure 5.  $^1\text{H}$  NMR spectra of compound **3c**.

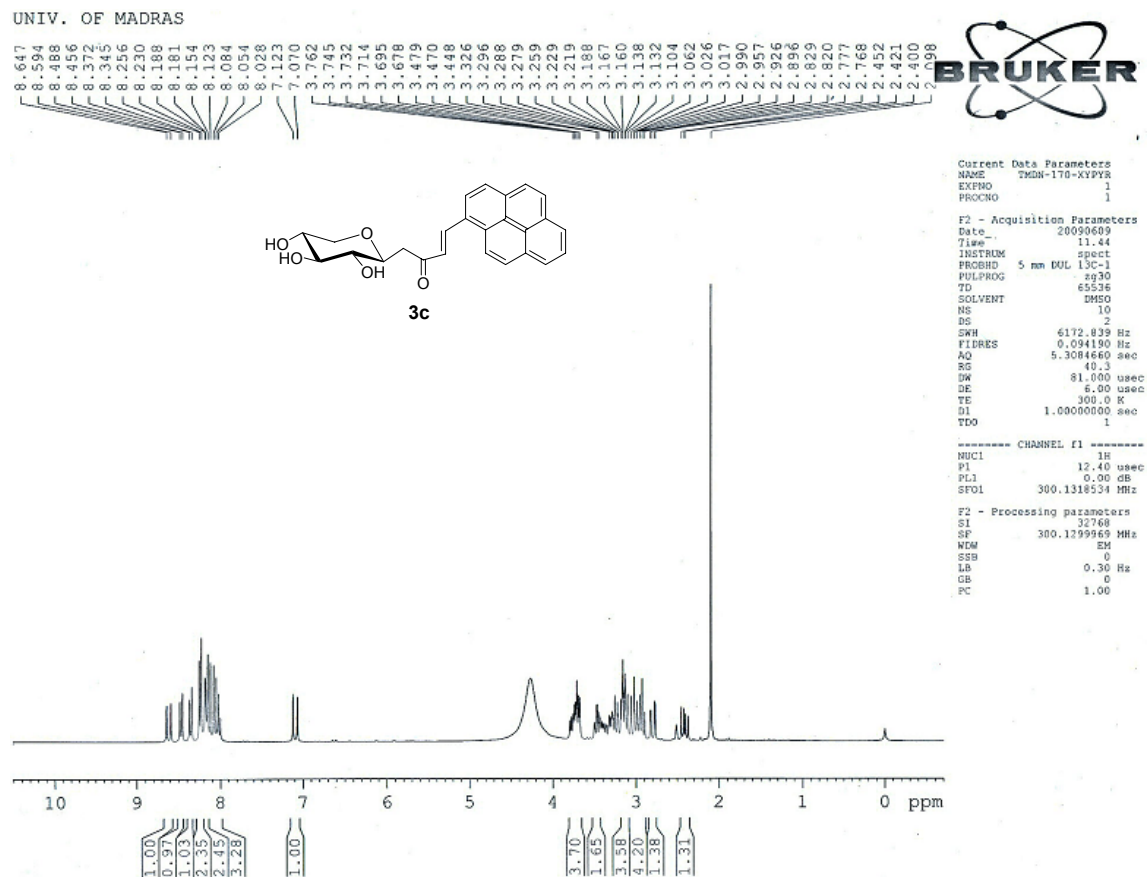

Figure 6.  $^{13}\text{C}$  NMR spectra of compound **3c**.

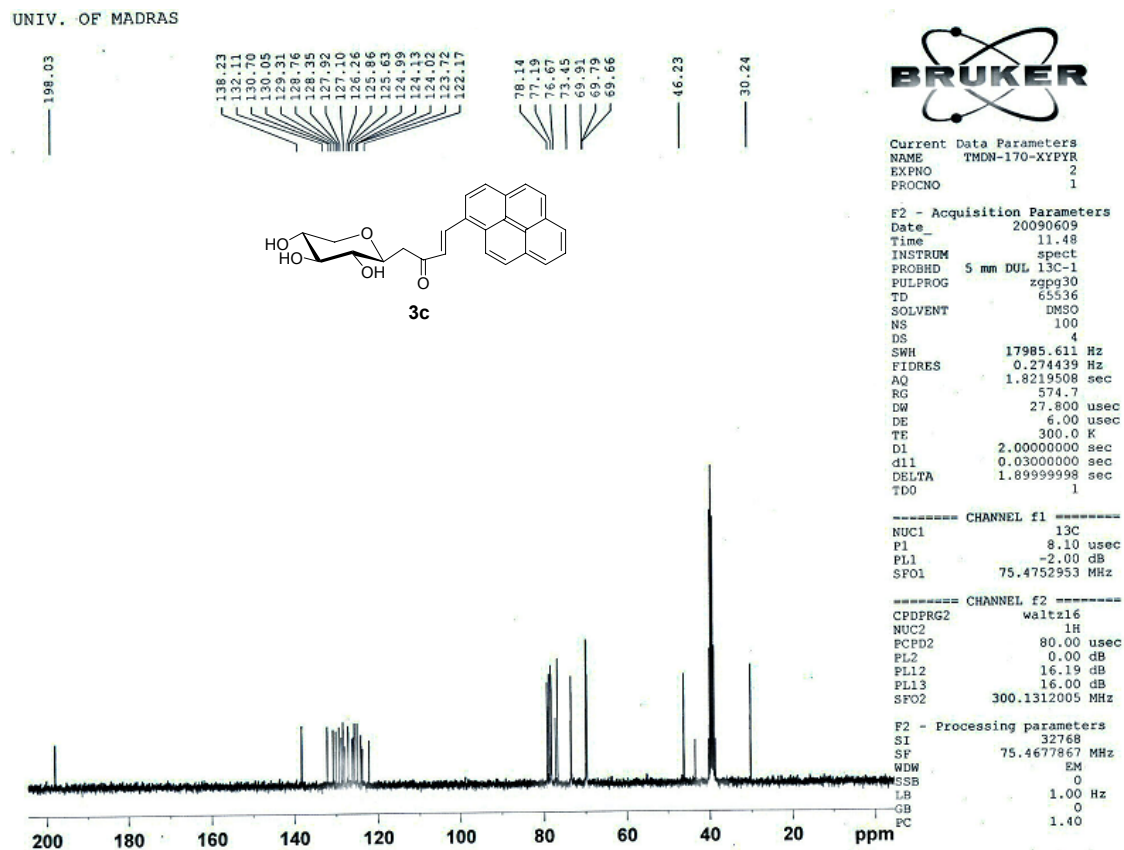

Figure 7.  $^1\text{H}$  NMR spectra of compound **3d**.

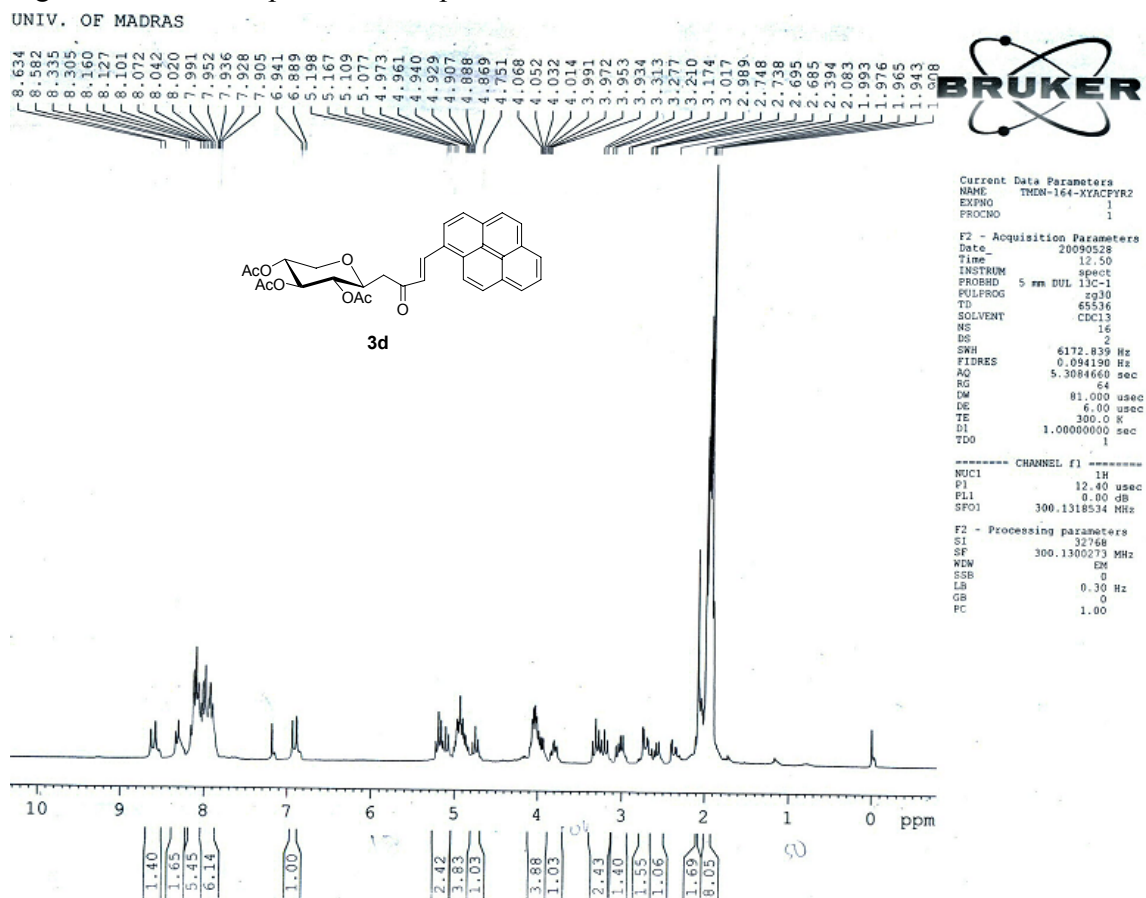



Figure 8.  $^{13}\text{C}$  NMR spectra of compound **3d**.

UNIV. OF MADRAS

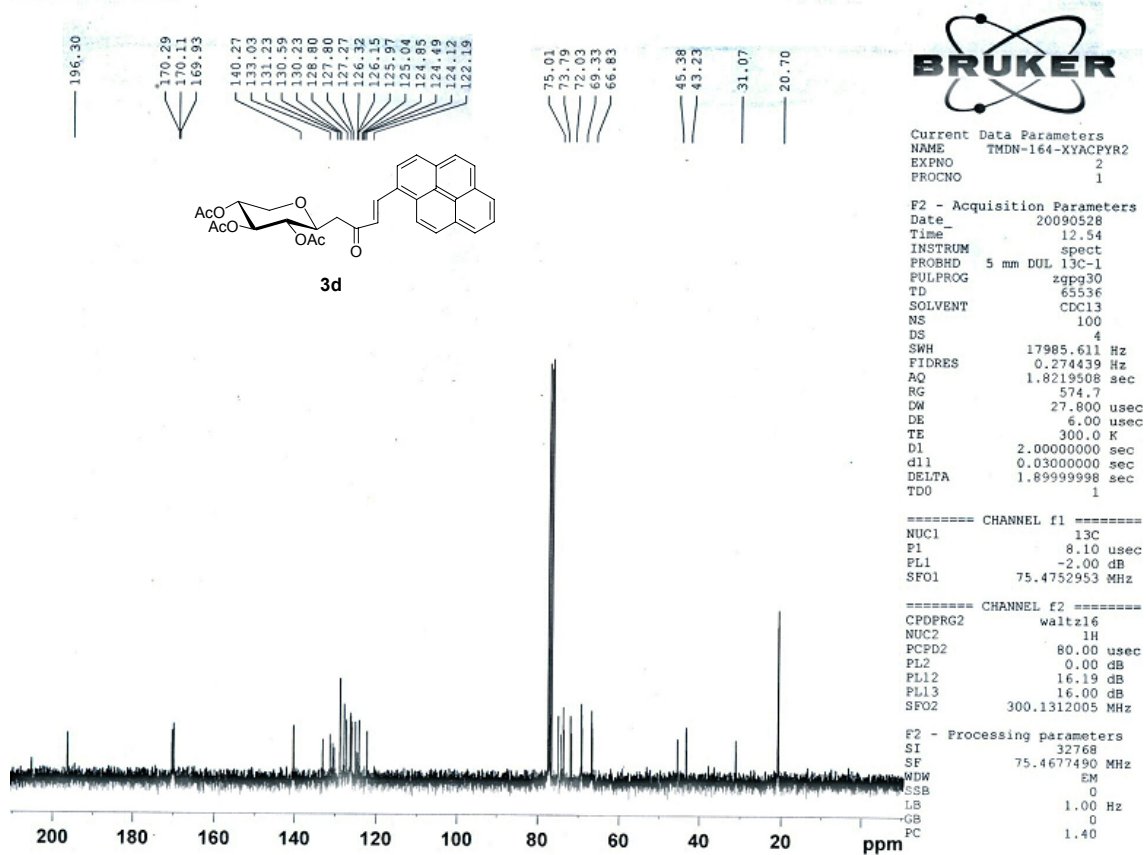

Figure 9. Microanalysis report (EDAX) of gel 3a

### Microanalysis Report

Prepared for: CODE Gel (3a)

Prepared by: NSK

6/25/2009

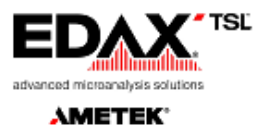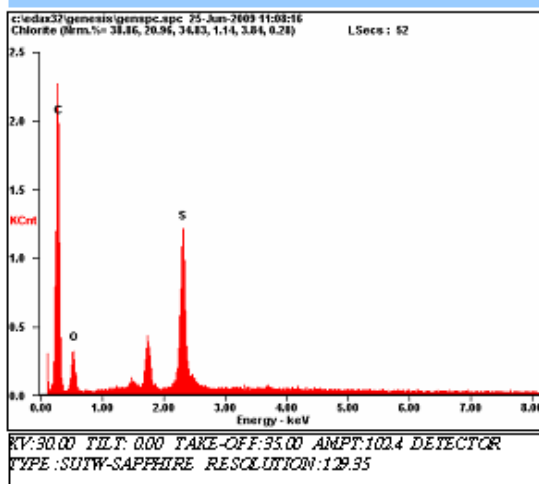

| Element | Wt %  | At %  |
|---------|-------|-------|
| C K     | 82.98 | 88.31 |
| O K     | 12.26 | 09.79 |
| S K     | 04.76 | 01.90 |

EDAX ZAF QUANTIFICATION STANDARDLESS SEC  
TABLE: DEFAULT

Figure 10 Microanalysis report (EDAX) of Sugar-pyrene functionalized SWCNT.

### Microanalysis Report

Prepared for: Sugar-pyrene functionalized SWCNT

Prepared by: nsk

6/25/2009

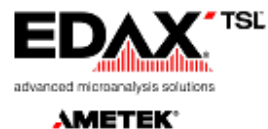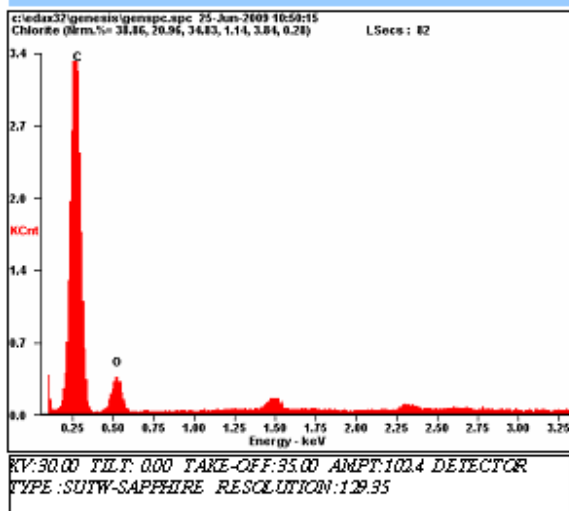

| Element | Wt %  | At %  |
|---------|-------|-------|
| C K     | 85.24 | 88.50 |
| O K     | 14.76 | 11.50 |

EDAX ZAF QUANTIFICATION STANDARDLESS SEC  
TABLE: DEFAULT

Figure 11. HRSEM image of gel, 3a (nanotubular architecture pointed by arrows)

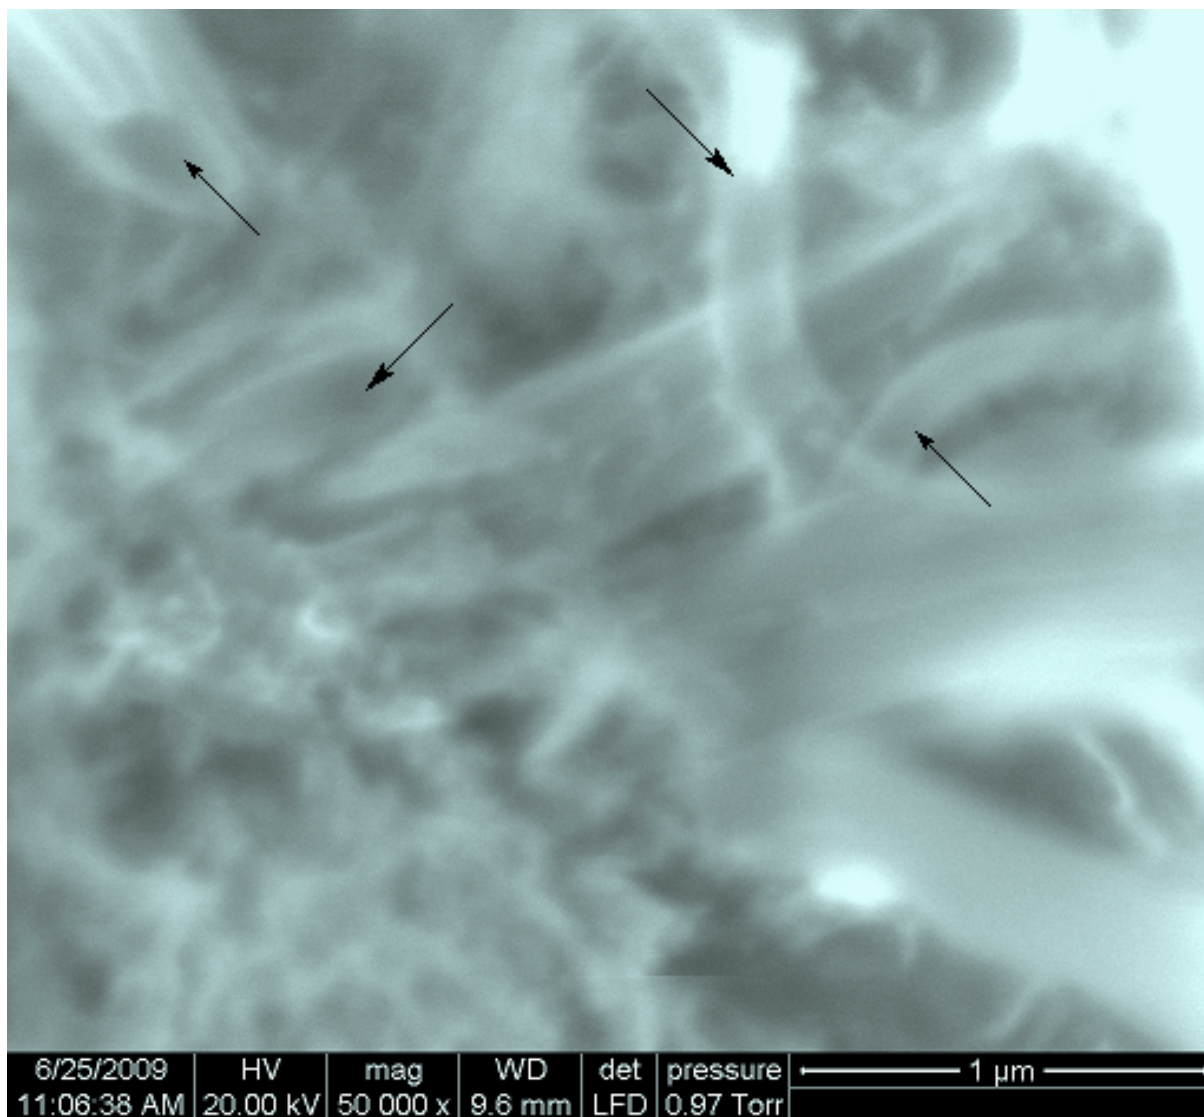

Supplement: b9nj00395a.pdf [file b9nj00395a.pdf]
